# Supplementary material for: Detection of circulating tumor cells in colorectal cancer patients using the GILUPI CellCollector: results from a prospective, single‐center study
Source: PubMed Central journal article supplement (PMC6599844; doi:10.1002/1878-0261.12507), 2019-06-17
Supplement: MOL2-13-1548-s002.pdf [file MOL2-13-1548-s002.pdf]

## Supplemental Tables:

| Variable                                     | Patients | Correlation coefficient | p-value |
|----------------------------------------------|----------|-------------------------|---------|
| CTC count (CC and CS)                        | 80       | -0.086                  | 0.449   |
| CTC positive (≥ 1 CTC) or negative (no CTC)  | 80       | -0.017                  | 0.880   |
| CTC positive (≥ 2 CTC) or negative (< 2 CTC) | 80       | -0.147                  | 0.194   |
| CTC positive (≥ 3 CTC) or negative (< 3 CTC) | 80       | -0.195                  | 0.082   |

**Table S1:** Spearman's correlation of the CS and CC results of all 80 patients.

| Suppl Table 2: Correlation between the prevalence of circulating tumor cells and clinicopathological parameters in colorectal cancer patients |             |        |                   |          |        |                   |                |        |              |          |        |         |    |        |       |    |        |       |
|-----------------------------------------------------------------------------------------------------------------------------------------------|-------------|--------|-------------------|----------|--------|-------------------|----------------|--------|--------------|----------|--------|---------|----|--------|-------|----|--------|-------|
| Patient subset                                                                                                                                | Cell Serach |        |                   |          |        |                   | Cell Collector |        |              |          |        |         |    |        |       |    |        |       |
|                                                                                                                                               | ≥ 1 CTC     |        | p-value           | ≥ 2 CTCs |        | p-value           | ≥ 1 CTC        |        | p-value      | ≥ 2 CTCs |        | p-value |    |        |       |    |        |       |
|                                                                                                                                               | n           | (%)    |                   | n        | (%)    |                   | n              | (%)    | n            | (%)      | n      | (%)     |    |        |       |    |        |       |
| <b>Age (yrs)</b>                                                                                                                              |             |        |                   |          |        |                   |                |        |              |          |        |         |    |        |       |    |        |       |
| < 70 (n=38)                                                                                                                                   | 13          | (34.2) | 0.587             | 8        | (21.1) | 0.823             | 7              | (18.4) | 0.617        | 12       | (32.6) | 0.095   | 10 | (26.3) | 0.261 | 7  | (18.4) | 0.084 |
| ≥ 70 (n=42)                                                                                                                                   | 12          | (28.6) |                   | 8        | (19.0) |                   | 6              | (14.3) |              | 21       | (50.0) |         | 16 | (38.1) |       | 15 | (35.7) |       |
| <b>Sex</b>                                                                                                                                    |             |        |                   |          |        |                   |                |        |              |          |        |         |    |        |       |    |        |       |
| Male (n=49)                                                                                                                                   | 18          | (36.7) | 0.183             | 12       | (24.5) | 0.207             | 9              | (18.4) | 0.519        | 21       | (42.9) | 0.714   | 16 | (32.7) | 0.971 | 13 | (26.5) | 0.807 |
| Female (n=31)                                                                                                                                 | 7           | (22.6) |                   | 4        | (12.9) |                   | 4              | (12.9) |              | 12       | (38.7) |         | 10 | (32.3) |       | 9  | (29.0) |       |
| <b>Primary tumor</b>                                                                                                                          |             |        |                   |          |        |                   |                |        |              |          |        |         |    |        |       |    |        |       |
| Location                                                                                                                                      |             |        |                   |          |        |                   |                |        |              |          |        |         |    |        |       |    |        |       |
| Colon (n=37)                                                                                                                                  | 15          | (40.5) | 0.212             | 12       | (32.4) | 0.077             | 9              | (24.3) | 0.256        | 14       | (37.8) | 0.765   | 12 | (32.4) | 0.788 | 9  | (24.3) | 0.952 |
| Rectum (n=24)                                                                                                                                 | 6           | (25.0) |                   | 3        | (12.5) |                   | 3              | (12.5) |              | 10       | (41.7) |         | 7  | (29.2) |       | 6  | (25.0) |       |
| Tumor stage                                                                                                                                   |             |        |                   |          |        |                   |                |        |              |          |        |         |    |        |       |    |        |       |
| T1/T2 (n=11)                                                                                                                                  | 1           | (9.1)  | 0.051             | 1        | (9.1)  | 0.187             | 0              | (0.0)  | 0.070        | 5        | (45.5) | 0.647   | 4  | (36.4) | 0.680 | 3  | (27.3) | 0.819 |
| T3/T4 (n=50)                                                                                                                                  | 20          | (40.0) |                   | 14       | (28.0) |                   | 12             | (24.0) |              | 19       | (38.0) |         | 15 | (30.0) |       | 12 | (24.0) |       |
| Lymph node                                                                                                                                    |             |        |                   |          |        |                   |                |        |              |          |        |         |    |        |       |    |        |       |
| N0 (n=22)                                                                                                                                     | 2           | (9.1)  | <b>0.002</b>      | 1        | (4.5)  | <b>0.006</b>      | 0              | (0.0)  | <b>0.004</b> | 8        | (36.4) | 0.720   | 6  | (27.3) | 0.624 | 5  | (22.7) | 0.800 |
| N+ (n=39)                                                                                                                                     | 19          | (48.7) |                   | 14       | (35.9) |                   | 12             | (30.8) |              | 16       | (41.0) |         | 13 | (33.3) |       | 10 | (25.6) |       |
| Distant metastasis                                                                                                                            |             |        |                   |          |        |                   |                |        |              |          |        |         |    |        |       |    |        |       |
| M0 (n=29)                                                                                                                                     | 2           | (6.9)  | <b>&lt; 0.001</b> | 1        | (3.4)  | <b>&lt; 0.001</b> | 1              | (3.4)  | <b>0.002</b> | 13       | (44.8) | 0.404   | 11 | (37.9) | 0.276 | 9  | (31.0) | 0.266 |
| M+ (n=32)                                                                                                                                     | 19          | (59.4) |                   | 14       | (43.8) |                   | 11             | (34.4) |              | 11       | (34.4) |         | 8  | (25.0) |       | 6  | (18.8) |       |
| UICC stage                                                                                                                                    |             |        |                   |          |        |                   |                |        |              |          |        |         |    |        |       |    |        |       |
| UICC VII (n=17)                                                                                                                               | 0           | (0.0)  | <b>&lt; 0.001</b> | 0        | (0.0)  | <b>0.006</b>      | 0              | (0.0)  | <b>0.016</b> | 6        | (35.3) | 0.687   | 5  | (29.4) | 0.856 | 4  | (23.5) | 0.905 |
| UICC III/IV (n=44)                                                                                                                            | 21          | (47.7) |                   | 15       | (34.1) |                   | 12             | (27.3) |              | 18       | (40.9) |         | 14 | (31.8) |       | 11 | (25.0) |       |
| <b>Recurrent disease</b>                                                                                                                      |             |        |                   |          |        |                   |                |        |              |          |        |         |    |        |       |    |        |       |
| Local recurrence (n=2)                                                                                                                        | 0           | (0.0)  | 0.440             | 0        | (0.0)  | 0.725             | 0              | (0.0)  | 0.725        | 0        | (0.0)  | 0.156   | 0  | (0.0)  | 0.253 | 0  | (0.0)  | 0.253 |
| Distant recurrence (n=17)                                                                                                                     | 4           | (23.5) |                   | 1        | (5.9)  |                   | 1              | (5.9)  |              | 9        | (52.9) |         | 7  | (41.2) |       | 7  | (41.2) |       |
| <b>Resection status</b>                                                                                                                       |             |        |                   |          |        |                   |                |        |              |          |        |         |    |        |       |    |        |       |
| R0 (n=60)                                                                                                                                     | 12          | (20.0) | <b>&lt; 0.001</b> | 7        | (11.7) | <b>0.001</b>      | 5              | (8.3)  | <b>0.001</b> | 26       | (43.3) | 0.512   | 20 | (33.3) | 0.783 | 17 | (28.3) | 0.772 |
| R1+R2 (n=20)                                                                                                                                  | 13          | (65.0) |                   | 9        | (45.0) |                   | 8              | (40.0) |              | 7        | (35.0) |         | 6  | (30.0) |       | 5  | (25.0) |       |

**Table S2:** Correlation of CTC detection with CS or CC using different cut-offs and clinicopathological characteristics. P-values were calculated by Mann-Whitney test for numerical and the chi-square test for categorical data
